# Supplementary material
Source: Springer Nature journal article supplement (https://www.springermedizin.de/resource/supplementary/13045_2013_379_MOESM2_ESM.pdf/9661246)

**a**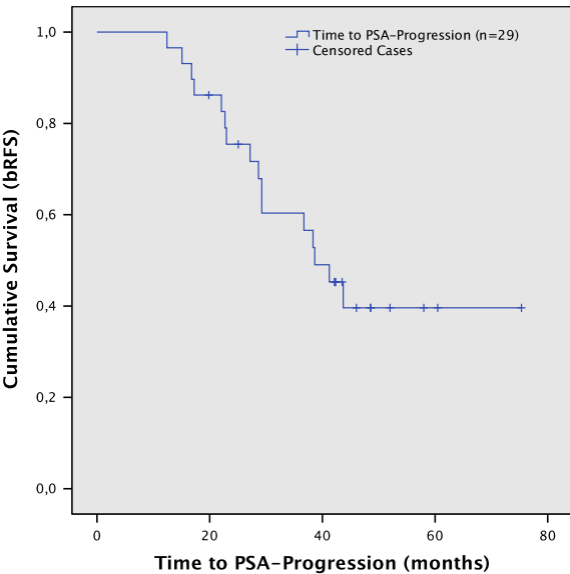**b**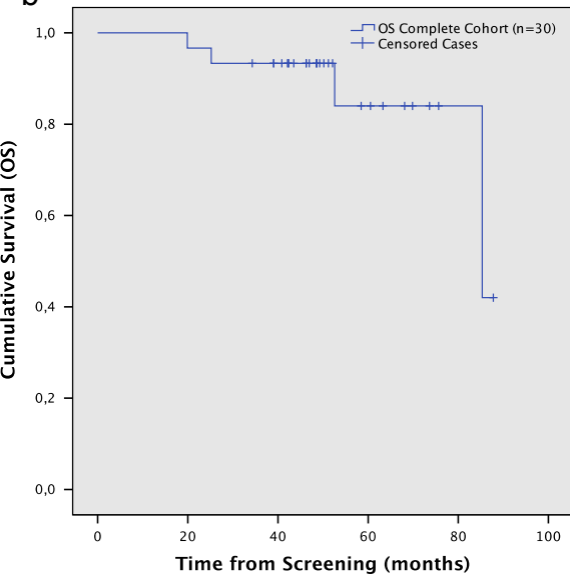

Supplement: MOESM2 [file 9661246]
